# Supplementary material for: Single-Cell RNA Sequencing Uncovers Neutrophil Clusters Associated with Autoimmune Neuroinflammation
Source: Research Square preprint supplement (doi:10.21203/rs.3.rs-8012709/v1), 2025-11-19
Supplement: Supplementary file 1 [file e776700ae50cd3095e8da561.pdf]

Wang, Y. et al. Supplementary Table 1

**Table 1. Information on MS Patient Population.**

|                                     |          | N    | Percent |       |
|-------------------------------------|----------|------|---------|-------|
| <b>Diagnosis</b>                    | RMS      | 27   | 90%     |       |
|                                     | PMS      | 3    | 10%     |       |
| <b>Ethnicity</b>                    | White    | 17   | 56.7%   |       |
|                                     | Black    | 12   | 40.0%   |       |
|                                     | Hispanic | 1    | 3.3%    |       |
|                                     |          | Mean | Median  | Range |
| <b>Age at Diagnosis (years)</b>     |          | 35.6 | 35      | 17-63 |
| <b>Age at First Symptom (years)</b> |          | 32.2 | 32      | 15-48 |

Wang, Y. et al. Supplementary Figure 1

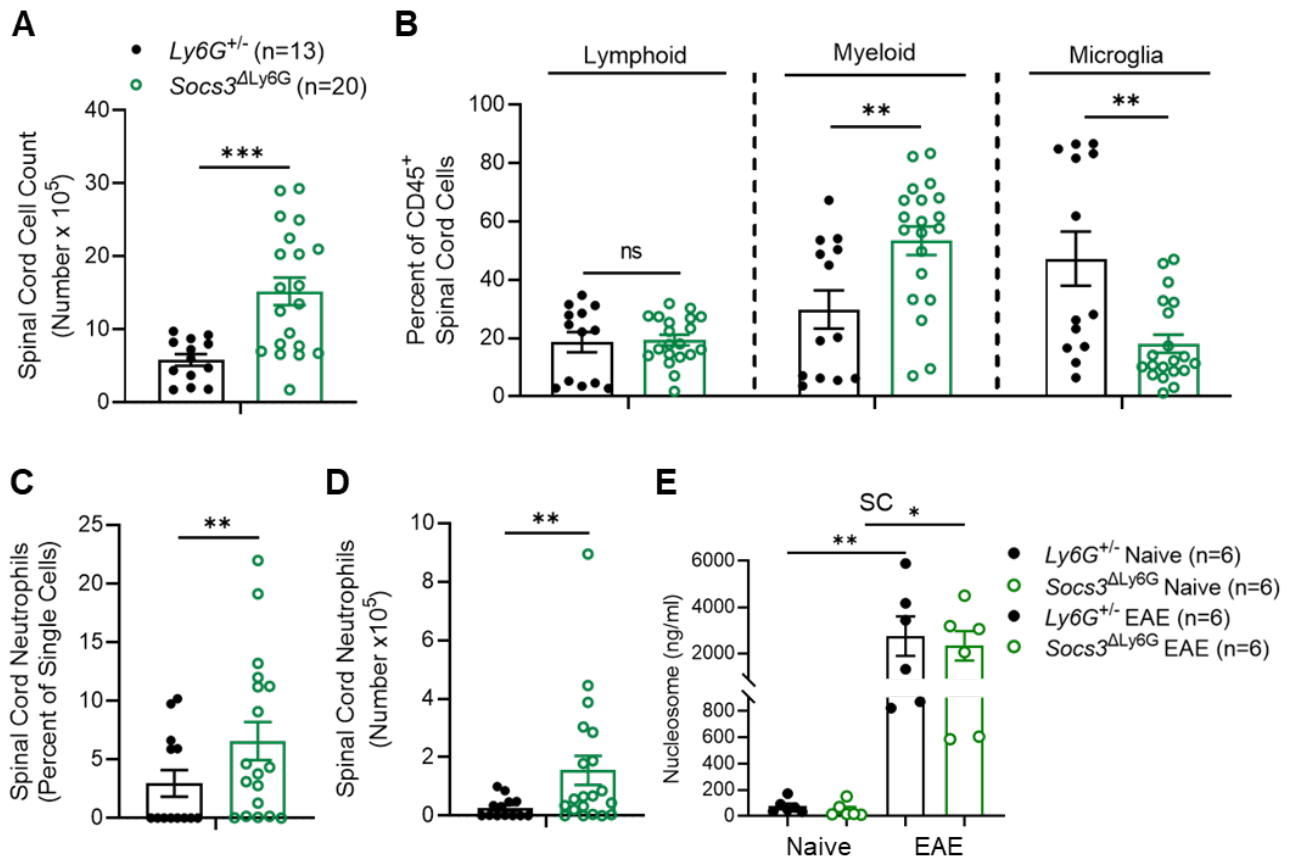

**Supplementary Figure 1. *Socs3*<sup>ΔLy6G</sup> Mice Exhibit Increased Spinal Cord Myeloid Cell and Neutrophil Infiltration.** EAE was induced in *Ly6G*<sup>+/-</sup> and *Socs3*<sup>ΔLy6G</sup> mice. At the peak of cEAE and btEAE, respectively, the spinal cord (SC) was collected to determine cell counts and percentages of immune cell populations, including lymphoid (CD45<sup>+</sup>CD11b<sup>-</sup>), myeloid (CD45<sup>hi</sup>CD11b<sup>+</sup>), and microglia (CD45<sup>lo</sup>CD11b<sup>+</sup>) (**A and B**). (**C**) Percent of SC neutrophils (CD45<sup>+</sup>CD11b<sup>+</sup>*Ly6G*<sup>+</sup>*Ly6C*<sup>low</sup>). (**D**) Total number of SC-infiltrating neutrophils. (**E**) At the peak of cEAE and btEAE in *Ly6G*<sup>+/-</sup> and *Socs3*<sup>ΔLy6G</sup> mice, respectively, SC homogenate samples were collected. H3.1-nucleosome expression was quantified by ELISA. \*p<0.05, \*\*p<0.01 and \*\*\*p<0.001. ns: not significant.

Wang, Y. et al. Supplementary Figure 2

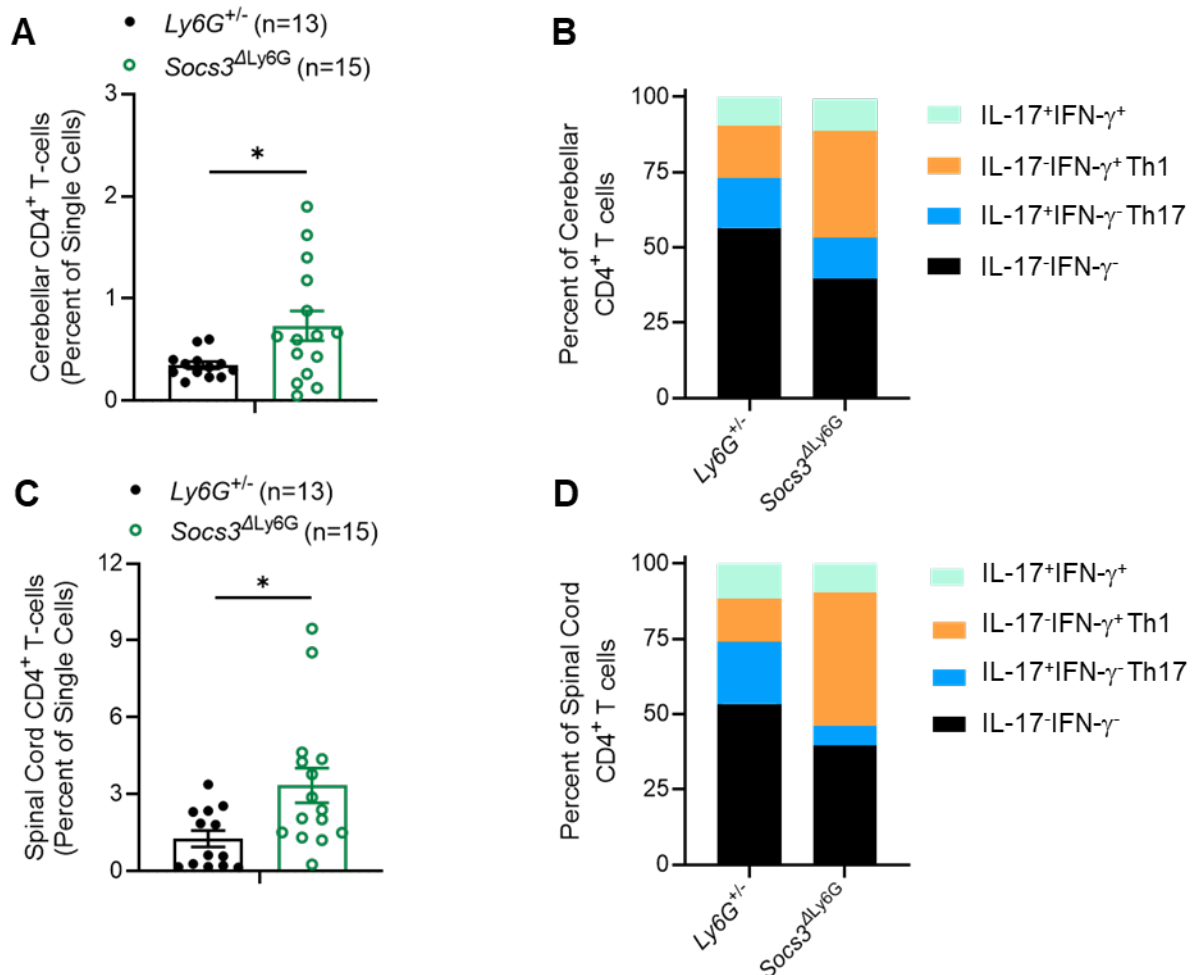

**Supplementary Figure 2. *Socs3*<sup>Δ*Ly6G*</sup> Mice Exhibit Increased CD4<sup>+</sup> T-cells that Skew to Th1.** EAE was induced in *Ly6G*<sup>+/-</sup> and *Socs3*<sup>Δ*Ly6G*</sup> mice. CB and SC tissues were collected at the peak of cEAE and btEAE, respectively, and analyzed by flow cytometry. CB and SC cells were stimulated for 4 h with PMA (25 ng/ml) and ionomycin (1  $\mu$ g/ml) in the presence of GolgiStop. **(A)** Percent of CB CD4<sup>+</sup> T-cells. **(B)** The proportion of IL-17 and IFN- $\gamma$  expression as a percent of total CB CD4<sup>+</sup> T-cells. **(C)** Percent of SC CD4<sup>+</sup> T-cells. **(D)** The proportion of IL-17 and IFN- $\gamma$  expression as a percent of total SC CD4<sup>+</sup> T-cells. \*p<0.05.

Wang, Y. et al. Supplementary Figure 3

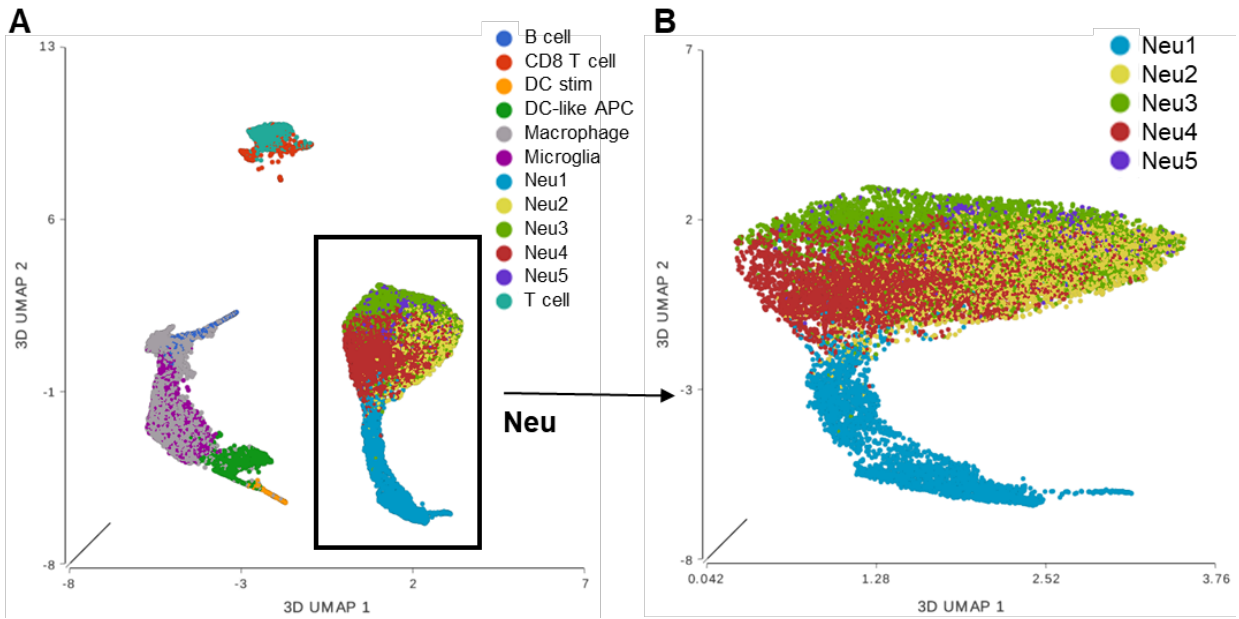

**Supplementary Figure 3. UMAP of All CD45<sup>+</sup>CD11b<sup>+</sup> Cells by scRNA-Seq.** EAE was induced in *Ly6G*<sup>+/-</sup> and *Socs3*<sup>Δ*Ly6G*</sup> mice, and then SC and/or CB were collected at the peak of EAE (days 12-14). Live CD45<sup>+</sup>CD11b<sup>+</sup> cells from the SC of *Ly6G*<sup>+/-</sup> mice with EAE (n=3), from the SC and CB of *Socs3*<sup>Δ*Ly6G*</sup> mice with EAE (n=3), and from the combined SC of naïve *Ly6G*<sup>+/-</sup> mice (n=3) and naïve *Socs3*<sup>Δ*Ly6G*</sup> mice (n=4) were subjected to scRNA-Seq. **(A)** All cell clusters are shown by UMAP. **(B)** UMAP of neutrophil clusters.

Wang, Y. et al. Supplementary Figure 4

A

| Neu1          | Neu2      | Neu3          | Neu4   | Neu5          |
|---------------|-----------|---------------|--------|---------------|
| Stfa3         | Hist1h2bc | Rab15         | Cxcl3  | A430057M04Rik |
| Ngp           | Entpd3    | Ccl3          | Lipg   | Rnd2          |
| Camp          | Igfbp6    | Hcar2         | Il1rap | Itpr2         |
| Scrg1         | Csf3r     | Fnip2         | Steap4 | Rem2          |
| Ltf           | Il1r2     | Ly6i          | Cxcl2  | Cxcl2         |
| Itgb2l        | Map1lc3b  | Gadd45b       | Ifit1  | Gm15337       |
| Retnlg        | Mmp9      | Ninj1         | Slfn4  | Gm13391       |
| Gpr27         | Cxcr2     | Ccr12         | Il1b   | Azi2          |
| Padi4         | Ifitm1    | Pmaip1        | Hdc    | 9130230L23Rik |
| Serp1nb1a     | Bcl2l15   | Cd274         | Ffar2  | Mbnl2         |
| Stfa2         | Klhl6     | Tmem140       | Isg20  | Rlf           |
| 1700047M11Rik | Hist1h4i  | Csf1          | Ier3   | Shisa4        |
| Tinagl1       | Pnpla2    | E230032D23Rik | Trem1  | Neat1         |
| Pglyrp1       | Hp        | Cstb          | Qsox1  | Vmp1          |
| Adpgk         | Prnp      | Il1rn         | Ifitm1 | Arid5b        |
| Mgst2         | Trp53inp1 | Cd24a         | Isg15  | Tgolin1       |
| Bmx           | Cd300lf   | Acod1         | Cstdc4 | Gm42696       |
| Anxa1         | Klhl24    | Basp1         | Acod1  | Vwa1          |
| Orm1          | Cd63      | Fth1          | Upp1   | Gadd45g       |
| Chil5         | Grina     | Clec4d        | Rsad2  | Frrs1         |

B

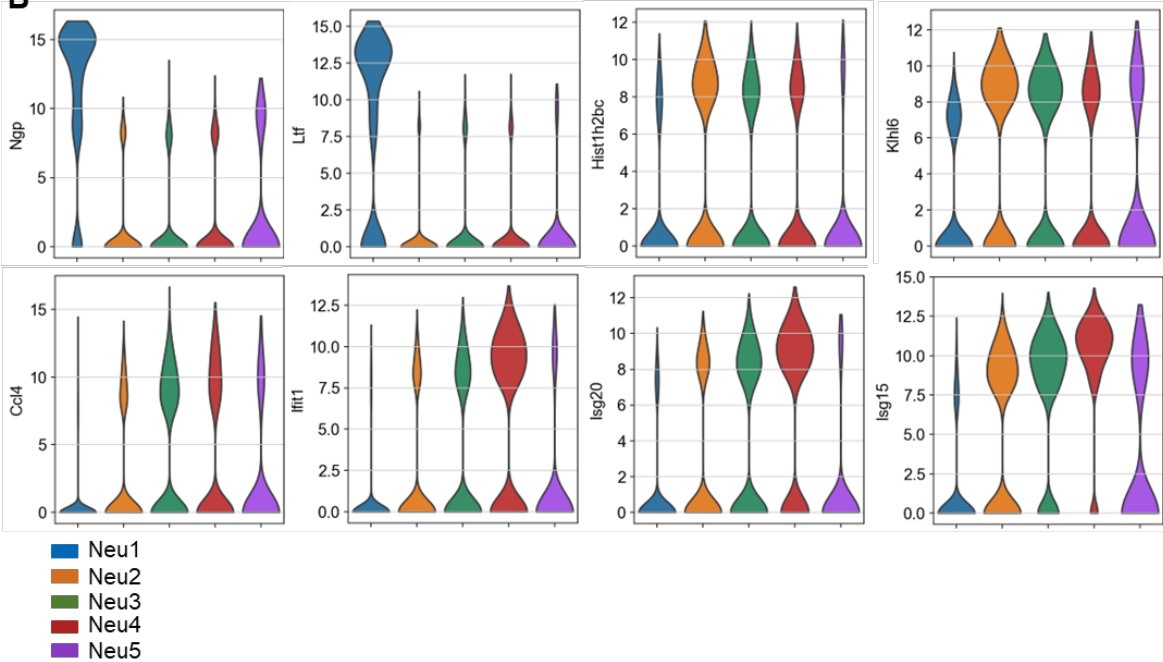

**Supplementary Figure 4. Top 20 Marker Genes from Each Neutrophil Cluster.** Live CD45<sup>+</sup>CD11b<sup>+</sup> cells from the SC of *Ly6G*<sup>+/-</sup> mice with EAE (n=3), from the SC and CB of *Socs3*<sup>Δ*Ly6G*</sup> mice with EAE (n=3), and from the combined SC of naïve *Ly6G*<sup>+/-</sup> mice (n=3) and naïve *Socs3*<sup>Δ*Ly6G*</sup> mice (n=4) were subjected to scRNA-Seq. **(A)** The top 20 marker genes are listed for each neutrophil cluster. **(B)** Violin plots colored for differential cluster-defining genes.

Wang, Y. et al. Supplementary Figure 5

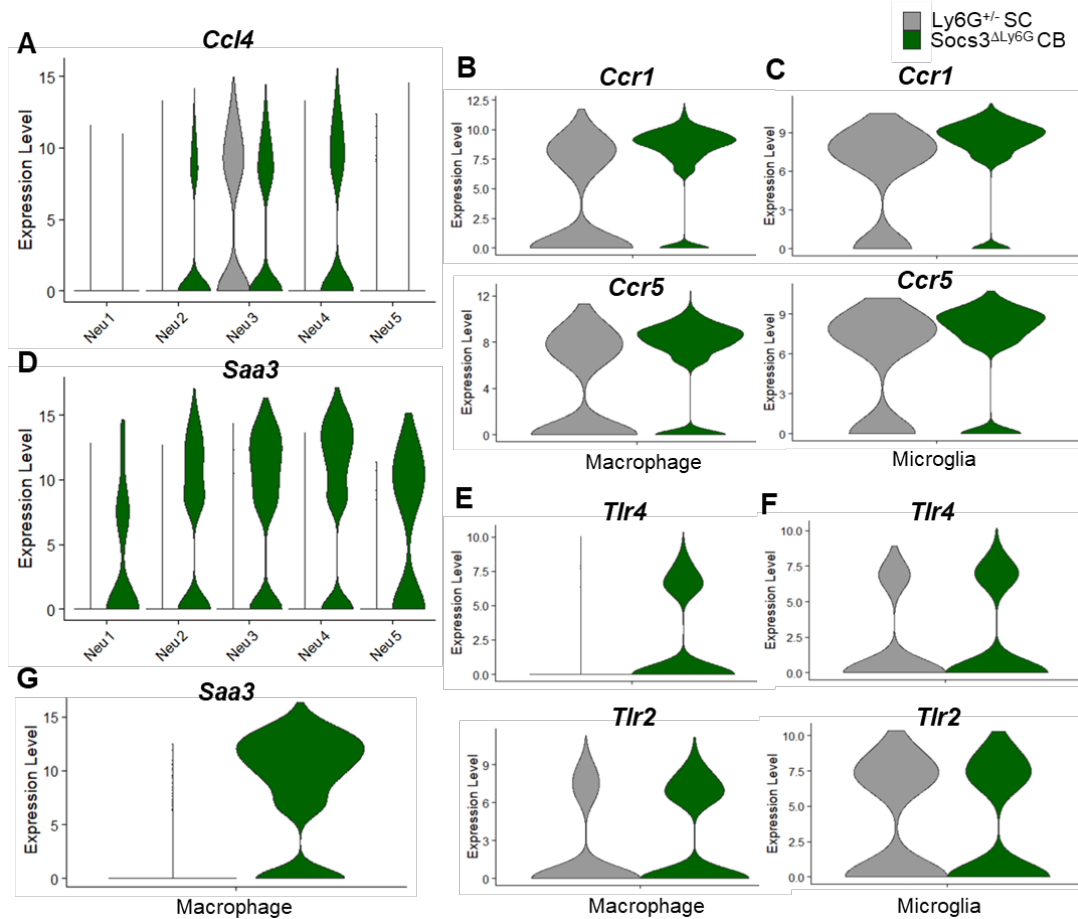

**Supplementary Figure 5. Ligand and Receptor Expression in Neutrophils and Macrophages/Microglia in Mice with EAE (*Socs3*<sup>ΔLy6G</sup> CB vs. *Ly6G*<sup>+/-</sup> SC).** EAE was induced in *Ly6G*<sup>+/-</sup> and *Socs3*<sup>ΔLy6G</sup> mice, and then SC or CB were collected at the peak of EAE (days 12-14). Live CD45<sup>+</sup>CD11b<sup>+</sup> cells from the SC of *Ly6G*<sup>+/-</sup> mice with EAE (n=3) and the CB of *Socs3*<sup>ΔLy6G</sup> mice with EAE (n=3) were subjected to scRNA-Seq. Ligand and receptor expression were compared between *Socs3*<sup>ΔLy6G</sup> CB and *Ly6G*<sup>+/-</sup> SC groups. **(A)** Violin plot of *Ccl4* expression (ligand) in neutrophil clusters in *Socs3*<sup>ΔLy6G</sup> CB (green) vs. *Ly6G*<sup>+/-</sup> SC (gray). **(B)** Violin plots of *Ccr1* and *Ccr5* (receptors) expression in macrophages. **(C)** Violin plots of *Ccr1* and *Ccr5* (receptors) expression in microglia. **(D)** Violin plot of *Saa3* (ligand) expression in neutrophils. **(E)** Violin plots of *Tlr4* and *Tlr2* (receptors) expression in macrophages. **(F)** Violin plots of *Tlr4* and *Tlr2* (receptors) expression in microglia. **(G)** Violin plot of *Saa3* (ligand) expression in macrophages.

Wang, Y. et al. Supplementary Figure 6

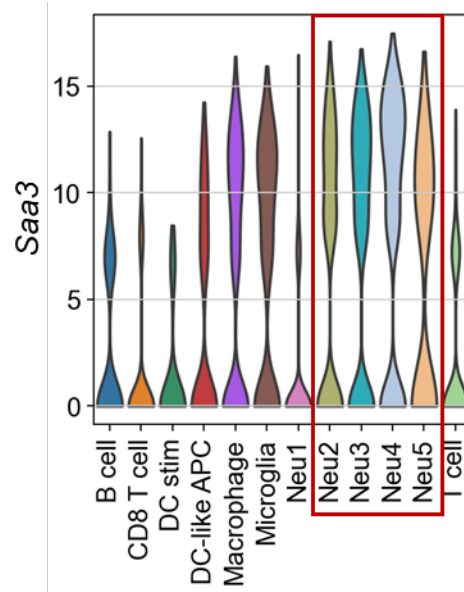

**Supplementary Figure 6. Expression of *Saa3* in Different Cell Clusters.** EAE was induced in *Ly6G*<sup>+/-</sup> and *Socs3*<sup>Δ*Ly6G*</sup> mice, and then SC and/or CB were collected at the peak of EAE (days 12-14). Live CD45<sup>+</sup>CD11b<sup>+</sup> cells from the SC of *Ly6G*<sup>+/-</sup> mice with EAE (n=3), from the SC and CB of *Socs3*<sup>Δ*Ly6G*</sup> mice with EAE (n=3), and from the combined SC of naïve *Ly6G*<sup>+/-</sup> mice (n=3) and naïve *Socs3*<sup>Δ*Ly6G*</sup> mice (n=4) were subjected to scRNA-Seq. Violin plot of *Saa3* expression in different clusters of scRNA-Seq dataset.
